# 1 **Environmental DNA degradation simulation from water temperature** 2 **and DNA fragment length: A meta-analysis approach**

3 **Tatsuya Saito\* and Hideyuki Doi**

4 Graduate School of Simulation Studies, University of Hyogo, 7-1-28 Minatojima-minamimachi,  
5 Chuo-ku, Kobe, 650-0047, Japan

6 **\* Correspondence:**

7 Tatsuya Saito

8 **e-mail: [tatwoeight630@icloud.com](mailto:tatwoeight630@icloud.com)**

9 **Keywords: environmental DNA, polymerase chain reaction, degradation rate, quantile model,**  
10 **meta-analysis**

## 11 **Abstract**

12 Environmental DNA (eDNA) analysis can detect aquatic organisms, including rare and endangered  
13 species, in a variety of habitats. The degradation of eDNA concentration is important to investigate  
14 their distribution and has also been experimentally evaluated. It is important to integrate these data to  
15 synthesize eDNA degradation in various environments. We collected the eDNA degradation rates  
16 and related factors, especially water temperature and fragment lengths of the measured DNA from 28  
17 studies. Our results suggest that water temperature and fragment length are significantly related to the  
18 eDNA degradation rate. From the 95% quantile model simulation, we predicted the maximum eDNA  
19 degradation rate in various combinations of water temperature and fragment length. Predicting eDNA  
20 degradation could be important for evaluating species distribution and inducing innovation of eDNA  
21 methods, especially for rare and endangered species with lower DNA concentrations.

## 22 **Introduction**

23 Environmental DNA (eDNA) methods are innovative methods developed for monitoring  
24 macroorganisms, especially aquatic species (Ficetola et al., 2008; Takahara et al., 2012; Minamoto et  
25 al., 2012; Taberlet et al., 2012; Ushio et al., 2018; Tsuji et al., 2019; Kakuda et al., 2019). The eDNA  
26 method is used to investigate species distribution, so it is less invasive to the environment and  
27 organisms, and is especially useful for rare and endangered species, which generally have low  
28 tolerance to sampling disturbance. Consequently, eDNA methods have been used to detect rare and  
29 endangered species in various taxa, such as fish, salamander, and aquatic insects (Fukumoto et al.  
30 2015; Sigsgaard et al., 2015; Pflieger et al. 2016; Doi et al., 2017; Sakata et al., 2017).

31 eDNA, which comprises DNA fragments released by organisms into environments such as  
32 water or soil, is thought to be derived from mixtures of feces (Martellini et al., 2005), skin cells  
33 (Ficetola et al., 2008), mucus (Merkes et al., 2014), and secretions (Bylemans et al., 2017) of  
34 organisms. Previous studies have suggested that eDNA is mainly derived from fractions of cells or  
35 cellular organs, but can also be derived from fragmental DNA in water (Turner et al., 2014;  
36 Minamoto et al., 2016).

37 Many points regarding the general behavior of eDNA in water (Barnes and Turner, 2016) are  
38 still unclear, especially the state and degradation of eDNA in the water (Turner et al., 2015; Barnes  
39 and Turner, 2016). Rare and endangered species are thought to have a small population and release a  
40 small amount of DNA (Fukumoto et al. 2015; Sigsgaard et al., 2015; Pflieger et al. 2016; Doi et al.,  
41 2017; Sakata et al., 2017). Understanding the state and degradation of eDNA allows us to apply  
42 eDNA methods for various situations, for example, distribution evaluation for rare and endangered  
43 species with lower biomass/abundance. Even for organisms living in their known habitat, eDNA  
44 degradation could induce false negatives when their distributions are studied. For conservation  
45 surveys using eDNA, it is important to gather knowledge about eDNA degradation.

46 Many experiments have been conducted to reveal the detailed states and degradation rates of  
47 eDNA under various conditions (Thomsen et al., 2012; Barnes et al., 2014; Maruyama et al., 2014;  
48 Tsuji et al., 2017; Jo et al., 2019). In most cases, the eDNA degradation curves declined  
49 exponentially and quickly, often in less than a week (Thomsen et al., 2012; Barnes et al., 2014).  
50 Earlier meta-analyses for eDNA degradation (Collins et al., 2018) found that water conditions, such  
51 as salinity (Collins et al., 2018), water temperature (Tsuji et al., 2017; Jo et al., 2019), and pH  
52 (Barnes et al., 2014; Tsuji et al., 2017), influenced the eDNA degradation rate. In addition, the  
53 characteristics of DNA itself, such as its measured fragment length, affected the eDNA degradation  
54 rate (Bylemans et al., 2018, Jo et al. 2019). A general model for eDNA degradation can be applied to  
55 consider the eDNA state of species, including rare and endangered species, in their habitats.  
56 Therefore, we conducted a novel meta-analysis to model the effects of water conditions and DNA  
57 fragment length on the eDNA degradation rate. The previous meta-analysis used the half-life of the  
58 degradation curve as an index of degradation. To evaluate the eDNA degradation behavior, we  
59 expected that the degradation rate (slope of a simple exponential model) would be useful.

60 Our aim was to evaluate the effects of water conditions and DNA fragment length on the  
61 degradation rate by meta-analyses using previous published data. From the synthesis, we conducted a  
62 simulation to predict the maximum degradation rate in combination with water temperature and  
63 fragment length by modeling the quantile model.

64

## 65 **Methods**

### 66 **2.1. Search strategy**

67 A Google Scholar search on September 9, 2020, using the search terms described below, returned  
68 11,300 hits. The initial filtering of the articles was based on their abstracts: any articles that obviously  
69 had no relevance to eDNA degradation were discarded. After title screening, 1,000 articles remained.  
70 After abstract screening, 42 articles remained. We manually inspected these remaining articles and  
71 selected papers describing the degradation rate of eDNA using experiments or field settings (Table  
72 S1). We finally obtained the data from 28 articles (Tables 1 and S1) for the meta-analysis.

### 73 **2.2. Data extraction**

74 From the selected publications, we assembled a list of factors for eDNA degradation (Table S1). We  
75 collected the following factors and categories: “Ecosystem” was divided into marine and freshwater.  
76 “Source” was categorized into water sources (Freshwater: river, lake, well water, pond, tap water and  
77 deionized water; Marine: marine and artificial seawater). “Temperature” and “pH” refer to the water  
78 temperature and pH of the water sample for each experiment, respectively. “Region” and “Fragment

79 length” refer to the amplified DNA region used for quantitative PCR (qPCR) and the number of  
80 amplified-DNA bases (bp), respectively.

81 We extracted the simple exponential slope (hereafter referred to as “degradation rate”) according to  
82 the simple exponential equation in each experiment:

$$83 \quad C = C_0 E^{kt}$$

84 where  $C_0$  is the eDNA concentration at time 0, i.e., the initial eDNA concentration, and  $k$  is the  
85 degradation slope (rate) constant per hour. We used the standardized degradation rate per hour.

86

### 87 **2.3. Statistical analysis and simulation**

88 We performed the statistical analysis and graphics using R ver. 4.0.2 (R Core Team, 2020). We  
89 tested the differences in the eDNA degradation rate in measured DNA regions and water resources  
90 using a linear mixed-effect model (LMM) using "lme4" ver. 1.1.23 package with "lmerTest" ver.  
91 3.1.2 package in R. We set each study as a random effect. We performed quantile models (QM) for  
92 0.1, 0.5, and 0.95 quantiles for the regression. We employed the Bayesian mixed-effect quantile  
93 model using the "lqmm" function of "lqmm" package ver. 1.5.5 in R. In the QM, we set water  
94 temperature and fragment length as explanatory effects and each study as the random effect. We  
95 performed the Nelder–Mead algorithm using 10000 MCMC permutations with the Gauss–Hermite  
96 quadrature approach. We set the statistical alpha as 0.05 for parameter evaluation. We did not find a  
97 significant interaction ( $p > 0.1$ ) between water temperature and fragment length, so we used the  
98 model excluding the interaction, i.e., eDNA degradation rate = water temperature + fragment length.  
99 We evaluated the QM models using the Akaike information criteria (AIC) of the different quantile  
100 models.

101 We simulated the combined effects of water temperature and fragment length and the  
102 maximum degradation rate under these conditions, using the obtained 0.95-quantile QM. We  
103 generated 100,000 random values for the combination of water temperature (ranging in published  
104 values from -1 to 35 °C; see the results) and fragment length used for the experiments (ranging in  
105 published values from 70 to 719) using "runif" function in R, which generates a random number from  
106 the Mersenne-Twister method. We used 100,000 random values to predict the eDNA degradation rate  
107 from the 0.95-quantile QM (see results).

## 108 **Results**

109

### 110 **3.1. Experiments**

111 The number of obtained time points for the eDNA degradation data ranged from 3 to 25 (mean: 8.3,  
112 median: 8.0, Fig. S1). Details of the site are listed as water sources (Table 1); 21 marine sites  
113 included sources from 19 freshwater sites, which included 4 river sites, 1 pond site, 3 lake sites, 2  
114 sites of well water, and 9 experiments with tap or deionized water, and 1 artificial seawater site. The  
115 temperature for the experiments ranged from -1 to 35 °C (mean: 19, median: 20, Fig. S1). The  
116 fragment length used for the experiments ranged from 70 to 719 bp (mean: 150, median: 131, Fig.

117 S1), and the fragment regions used were mainly Cyt B or COI regions in mitochondrial DNA (Table  
118 1).

### 119 3.2 Degradation rate

120 The degradation rate for the eDNA degradation data ranged from 0.0005 to 0.7010 (mean: 0.1317,  
121 median: 0.0440, Fig. S1). Differences in PCR regions did not affect the rate of DNA degradation, nor  
122 did differences in water sources (Fig. 1A, B). There were no significant differences among the water  
123 sources and PCR regions (LMM,  $t < 1.859$ ,  $p > 0.07$ ).

### 124 3.3. Quantile model for temperature and fragment length

125 The relationship between eDNA degradation rate and water temperature showed that higher water  
126 temperatures accelerated eDNA degradation (Fig. 2A). Upon comparing the QM of 0.1-, 0.5-, and  
127 0.95- quantiles, the QM with 0.95-quantile was observed to have the lowest AIC value (0.1-  
128 quantile: 86.97, 0.5-quantile: -102.07, and 0.95-quantile: -208.47). Therefore, we simulated and  
129 discussed these data using the QM with a 0.95-quantile with a positive slope (slope = 0.020, Fig. 2A).  
130 The relationship between eDNA degradation rate and fragment length showed that longer fragments  
131 accelerated eDNA degradation (Fig. 2B). Most of the amplification regions of PCR primers designed  
132 for detecting environmental DNA so far were 200 bp or less. For fragment length, as for water  
133 temperature, the QM with 0.95-quantile had the lowest AIC value (0.1-quantile: 163.1 (df = 4), 0.5-  
134 quantile: -100.6, and 0.95-quantile: -127.5). Therefore, we simulated and discussed these data using  
135 the QM with a 0.95-quantile with a positive slope (slope = 0.197).

### 136 3.4. eDNA degradation simulation

137 Our QM simulation lead to plotting the eDNA degradation on a matrix of water temperature and  
138 fragment length (Fig. 3) and showed that the water temperature had a great influence on the eDNA  
139 degradation rate. At lower (e.g., 0 to 5 °C) and higher (e.g., 15 to 35 °C) water temperatures, we  
140 predicted that fragment length would have a smaller effect on the eDNA degradation rate, while at  
141 moderate (e.g., 5 to 15 °C) water temperatures, our prediction more clearly showed that the longer  
142 fragments would have a faster degradation rate. Thus, at moderate water temperatures, the fragment  
143 length should also be considered in evaluating eDNA degradation.

## 144 DISCUSSION

145 Our meta-analysis results showed that higher water temperatures and longer fragments accelerated  
146 eDNA degradation. These generally supported the effect of water temperature on the eDNA  
147 degradation rate in previous hypotheses for each condition and species (e. g., Strickler et al., 2015;  
148 Eichmiller et al., 2016; Lance et al., 2017; Tsuji et al., 2017; Jo et al., 2018; Kasai et al., 2020).  
149 Previous studies have assumed that water temperature does not directly affect eDNA degradation, but  
150 indirectly affects it through enzymatic hydrolysis by microbes and extracellular nucleases (Barnes  
151 and Turner 2016). At high temperatures, with increasing activity of microorganisms and extracellular  
152 enzymes, the eDNA in water would decompose more quickly (Barnes and Turner, 2016).

153 In addition, long DNA fragments were less likely to be detected than short fragments, and our  
154 meta-analysis supported the previous results. For example, Jo et al. (2017) suggested that the DNA  
155 degradation rate was higher in longer fragments (719 bp) than in shorter fragments (127 bp). Our  
156 simulation by QM indicated that shorter fragments were more likely to be retained when equivalent  
157 eDNA degradation occurred due to water temperature. When the eDNA degradation rates were very

158 fast or very slow due to water temperature, the fragment length had a smaller effect on eDNA  
159 degradation than at other water temperature ranges. When the temperature-dependent degradation  
160 was very fast, we would expect that the eDNA would decompose regardless of the fragment length,  
161 probably because short fragments would be decomposed at a similar rate to longer ones, and hence,  
162 would not be retained. However, when temperature-dependent degradation occurs slowly, fragment  
163 length might influence the eDNA degradation rate because the longer DNA fragments could be  
164 retained, depending on their lengths. In our meta-analysis, we evaluated fragment lengths ranging  
165 from 70 to 719 bp, but there were no experiments in which longer fragments were measured.  
166 Recently, the long-PCR method has been developed for evaluating longer fragments of mitochondrial  
167 DNA (Deiner et al., 2017). By examining longer fragments of mitochondrial DNA, future studies can  
168 better understand the effect of fragment length on eDNA degradation.

169 There are some cases where eDNA has not been detected, even if the habitat of organisms has  
170 been confirmed. It has been pointed out that false negatives may involve eDNA degradation in the  
171 environment and eDNA measurement processes, such as water sample transport (Barnes and Turner  
172 2016). By predicting the amount of eDNA degradation, we can estimate, for example, how much  
173 eDNA will be degraded by the time the water sample has been transported to the laboratory. If the  
174 amount of such degraded eDNA is not taken into consideration, species distribution and  
175 abundance/biomass may be underestimated, especially for low-density species such as rare and  
176 endangered species. Thus, we can apply the understanding and suppression of eDNA degradation to  
177 the detection of trace eDNA amounts. Similarly, we can apply the understanding of invasive  
178 distribution evaluation by eDNA because it is important to detect alien species in the early stages of  
179 invasion, when their abundance, i.e., eDNA concentration, may be low. Considering the rapid eDNA  
180 degradation in water, it is important to suppress any decomposition after obtaining the water sample.  
181 Several methods have been used to suppress eDNA degradation, including the addition of  
182 benzalkonium chloride (BAC) to transport water samples (Yamanaka et al., 2017; Takahara et al.,  
183 2020), ethanol or isopropanol fixations of water samples for transport (Doi et al. 2017), filtering at a  
184 water sampling site, and storing in RNAlater (Sigma-Aldrich, St. Louis, MO, USA) (Miya et al.,  
185 2016). These methods may be very useful for suppressing eDNA degradation, especially for  
186 environments with higher water temperatures and for detecting longer DNA fragments.

187 In conclusion, we found that higher water temperatures and longer DNA fragments generally  
188 accelerated eDNA degradation. We predicted the combined effects of water temperature and  
189 fragment length on the maximum eDNA degradation rate. Our meta-analysis and simulation  
190 provided new insights for future eDNA studies. We should note the limitations: The number of  
191 papers used for our meta-analysis was limited to 28 studies, and the data was limited especially for  
192 other environmental factors, such as UV, pH, and salinity, which are important factors for eDNA  
193 degradation (Mächler et al., 2018; Barnes et al., 2014; Tsuji et al., 2017; Lance et al., 2018; Collins et  
194 al., 2018). When data such as UV, pH, and salinity are obtained in addition to water temperature,  
195 more complex phenomena can be evaluated to determine the eDNA degradation rate in water. A  
196 greater understanding and accumulation of eDNA degradation data would improve future eDNA  
197 methods.

198

## 199 **Conflict of Interest**

200 The authors declare that the research was conducted in the absence of any commercial or financial  
201 relationships that could be construed as a potential conflict of interest.

202 **Author Contributions**

203 TS and HD designed the study; TS collected the data; TS and HD analyzed the data and interpreted  
204 the results; and TS and HD wrote the manuscript.

205 **Acknowledgments**

206 We thank the authors of all the papers used for the meta-analysis. This study was supported by the  
207 Environment Research and Technology Development Fund (4-2004).

208 **References**

- 209 Andruszkiewicz, E.A., Sassoubre, L.M., Boehm, A.B. (2017). Persistence of marine fish  
210 environmental DNA and the influence of sunlight. *PLoS One*. 12(9):e0185043.  
211 doi:10.1371/journal.pone.0185043
- 212 Barnes, M.A., and Turner, C.R. (2016). The ecology of environmental DNA & implications for  
213 conservation genetics. *Conserv. Genet.* 17(1), 1-17. doi:10.1007/s10592-015-0775-4
- 214 Barnes, M.A., Turner, C.R., Jerde, C.L., Renshaw, M.A., Chadderton, W.L., Lodge, D.M. (2014).  
215 Environmental conditions influence eDNA persistence in aquatic systems. *Environ. Sci. Technol.*  
216 48(3), 1819-1827. doi:10.1021/es404734p
- 217 Bylemans, J., Furlan, E.M., Hardy, C.M., McGuffie, P., Lintermans, M., Gleeson, D.M. (2017). An  
218 environmental DNA - based method for monitoring spawning activity: A case study, using the  
219 endangered Macquarie perch (*Macquaria australasica*). *Methods Ecol. Evol.* 8(5), 646-655.  
220 doi:10.1111/2041-210X.12709
- 221 Collins, R.A., Wangenstein, O.S., O’Gorman, E.J., Mariani, S., Sims, D.W., Genner, M.J. (2018).  
222 Persistence of environmental DNA in marine systems. *Commun. Biol.* 1(1), 1-11.  
223 doi:10.1038/s42003-018-0192-6
- 224 Cowart, D.A., Murphy, K.R., Cheng, C.H.C. (2018). Metagenomic sequencing of environmental  
225 DNA reveals marine faunal assemblages from the West Antarctic Peninsula. *Mar. Genomics.* 37,  
226 148-160. doi:10.1016/j.margen.2017.11.003
- 227 Deiner, K., Bik, H.M., Mächler, E., Seymour, M., Lacoursière - Roussel, A., Altermatt, F., Creer, S.,  
228 Bista, I., Lodge, D.M., De Vere, N., Pfrender, M.E. (2017). Environmental DNA metabarcoding:  
229 Transforming how we survey animal and plant communities. *Mol. Ecol.* 26(21), 5872-5895.  
230 doi:10.1111/mec.14350
- 231 Doi, H., Katano, I., Sakata, Y., Souma, R., Kosuge, T., Nagano, M., Ikeda, K., Yano, K., Tojo, K.  
232 (2017). Detection of an endangered aquatic heteropteran using environmental DNA in a wetland  
233 ecosystem. *R. Soc. Open Sci.* 4(7):170568. doi:10.1098/rsos.170568
- 234 Doi, H., Uchii, K., Matsushashi, S., Takahara, T., Yamanaka, H., Minamoto, T. (2017). Isopropanol  
235 precipitation method for collecting fish environmental DNA. *Limnol. Oceanogr.* 15(2), 212-218.  
236 doi:10.1002/lom3.10161

- 237 Eichmiller, J.J., Miller, L.M., Sorensen, P.W. (2016). Optimizing techniques to capture and extract  
238 environmental DNA for detection and quantification of fish. *Mol. Ecol. Resour.* 16(1), 56-68.  
239 doi:10.1111/1755-0998.12421
- 240 Ficetola, G.F., Miaud, C., Pompanon, F., Taberlet, P. (2008). Species detection using environmental  
241 DNA from water samples. *Biol. Lett.* 4(4), 423-425. doi:10.1098/rsbl.2008.0118
- 242 Fukumoto, S., Ushimaru, A., Minamoto, T. (2015). A basin - scale application of environmental  
243 DNA assessment for rare endemic species and closely related exotic species in rivers: A case study of  
244 giant salamanders in Japan. *J. Appl. Ecol.* 52(2), 358-365. doi:10.1111/1365-2664.12392
- 245 Jo, T., Murakami, H., Masuda, R., Minamoto, T. (2020). Selective collection of long fragments of  
246 environmental DNA using larger pore size filter. *Sci. Total Environ.* 735:139462.  
247 doi:10.1016/j.scitotenv.2020.139462
- 248 Jo, T., Murakami, H., Yamamoto, S., Masuda, R., Minamoto, T. (2019). Effect of water temperature  
249 and fish biomass on environmental DNA shedding, degradation, and size distribution. *Ecol. Evol.*  
250 9(3), 1135-1146. doi:10.1002/ece3.4802
- 251 Kakuda, A., Doi, H., Souma, R., Nagano, M., Minamoto, T., Katano, I. (2019). Detection of  
252 environmental DNA of the invasive red-eared slider in ponds for evaluating their distribution with  
253 comparison to water quality. *PeerJ Prepr.* 7:e27505v1. doi:10.7287/peerj.preprints.27505v1
- 254 Kasai, A., Takada, S., Yamazaki, A., Masuda, R., Yamanaka, H. (2020). The effect of temperature on  
255 environmental DNA degradation of Japanese eel. *Fish. Res.* 1-7. doi:10.1007/s12562-020-01409-1
- 256 Lance, R.F., Klymus, K.E., Richter, C.A., Guan, X., Farrington, H.L., Carr, M.R., Thompson, N.,  
257 Chapman, D.C., Baerwaldt, K.L. (2017). Experimental observations on the decay of environmental  
258 DNA from bighead and silver carps. *Manag. Biol. Invasions.* 8(3):343. doi:10.3391/mbi.2017.8.3.08
- 259 Mächler, E., Osathanunkul, M., Altermatt, F. (2018). Shedding light on eDNA: neither natural levels  
260 of UV radiation nor the presence of a filter feeder affect eDNA-based detection of aquatic organisms.  
261 *PLoS One.* 13(4):e0195529. doi:10.1371/journal.pone.0195529
- 262 Martellini, A., Payment, P., Villemur, R. (2005). Use of eukaryotic mitochondrial DNA to  
263 differentiate human, bovine, porcine and ovine sources in fecally contaminated surface water. *Water*  
264 *Res.* 39(4), 541-548. doi:10.1016/j.watres.2004.11.012
- 265 Maruyama, A., Nakamura, K., Yamanaka, H., Kondoh, M., Minamoto, T. (2014). The release rate of  
266 environmental DNA from juvenile and adult fish. *PLoS One.* 9(12):e114639.  
267 doi:10.1371/journal.pone.0114639
- 268 Merkes, C.M., McCalla, S.G., Jensen, N.R., Gaikowski, M.P., Amberg, J.J. (2014). Persistence of  
269 DNA in carcasses, slime and avian feces may affect interpretation of environmental DNA data. *PLoS*  
270 *One.* 9(11). doi:10.1371/journal.pone.0113346
- 271 Minamoto, T., Naka, T., Moji, K., Maruyama, A. (2016). Techniques for the practical collection of  
272 environmental DNA: filter selection, preservation, and extraction. *Limnol.* 17(1), 23-32.  
273 doi:10.1007/s10201-015-0457-4

- 274 Minamoto, T., Yamanaka, H., Takahara, T., Honjo, M.N., Kawabata, Z.I. (2012). Surveillance of fish  
275 species composition using environmental DNA. *Limnol.* 13(2), 193-197. doi:10.1007/s10201-011-  
276 0362-4
- 277 Miya, M., Minamoto, T., Yamanaka, H., Oka, S.I., Sato, K., Yamamoto, S., Sado, T., Doi, H. (2016).  
278 Use of a filter cartridge for filtration of water samples and extraction of environmental DNA. *JoVE-J.*  
279 *Vis. Exp.* (117):e54741. doi:10.3791/54741
- 280 Moushomi, R., Wilgar, G., Carvalho, G., Creer, S., Seymour, M. (2019). Environmental DNA size  
281 sorting and degradation experiment indicates the state of *Daphnia magna* mitochondrial and nuclear  
282 eDNA is subcellular. *Sci. Rep.* 9(1), 1-9. doi: 10.1038/s41598-019-48984-7
- 283 Nevers, M.B., Byappanahalli, M.N., Morris, C.C., Shively, D., Przybyla-Kelly, K., Spoljaric, A.M.,  
284 Dickey, J., Roseman, E.F. (2018). Environmental DNA (eDNA): A tool for quantifying the abundant  
285 but elusive round goby (*Neogobius melanostomus*). *PloS one.* 13(1):e0191720.  
286 doi:10.1371/journal.pone.0191720
- 287 Nukazawa, K., Hamasuna, Y., Suzuki, Y. (2018). Simulating the advection and degradation of the  
288 environmental DNA of common carp along a river. *Environ. Sci. Technol.* 52(18), 10562-10570.  
289 doi:10.1021/acs.est.8b02293
- 290 Pflieger, M.O., Rider, S.J., Johnston, C.E., Janosik, A.M. (2016). Saving the doomed: Using eDNA to  
291 aid in detection of rare sturgeon for conservation (Acipenseridae). *Glob. Ecol. Conserv.* 8, 99-107.  
292 doi:10.1016/j.gecco.2016.08.008
- 293 R Core Team. (2020). R: A language and environment for statistical computing. R Foundation for  
294 Statistical Computing, Vienna, Austria. <https://www.R-project.org/> [Accessed October 1, 2020].
- 295 Saito, T., and Doi, H. (2020). Degradation modeling of water environmental DNA: Experiments on  
296 multiple DNA sources in pond and seawater. *BioRxiv.* doi:10.1101/2020.04.03.023283
- 297 Sakata, M.K., Maki, N., Sugiyama, H., Minamoto, T. (2017). Identifying a breeding habitat of a  
298 critically endangered fish, *Acheilognathus typus*, in a natural river in Japan. *Sci. Nat.* 104(11-  
299 12):100. doi:10.1007/s00114-017-1521-1
- 300 Sansom, B.J., and Sassoubre, L.M. (2017). Environmental DNA (eDNA) shedding and decay rates to  
301 model freshwater mussel eDNA transport in a river. *Environ. Sci. Technol.* 51(24), 14244-14253.  
302 doi:10.1021/acs.est.7b05199
- 303 Sassoubre, L.M., Yamahara, K.M., Gardner, L.D., Block, B.A., Boehm, A.B. (2016). Quantification  
304 of environmental DNA (eDNA) shedding and decay rates for three marine fish. *Environ. Sci.*  
305 *Technol.* 50(19), 10456-10464. doi:10.1021/acs.est.6b03114
- 306 Sengupta, M.E., Hellström, M., Kariuki, H.C., Olsen, A., Thomsen, P.F., Mejer, H., Willerslev, E.,  
307 Mwanje, M.T., Madsen, H., Kristensen, T.K., Stensgaard, A.S. (2019). Environmental DNA for  
308 improved detection and environmental surveillance of schistosomiasis. *Proc. Natl. Acad. Sci.*  
309 116(18), 8931-8940. doi:10.1073/pnas.1815046116



- 310 Sigsgaard, E.E., Carl, H., Møller, P.R., Thomsen, P.F. (2015). Monitoring the near-extinct European  
311 weather loach in Denmark based on environmental DNA from water samples. *Biol. Conserv.* 183,  
312 46-52. doi:10.1016/j.biocon.2014.11.023
- 313 Strickler, K.M., Fremier, A.K., Goldberg, C.S. (2015). Quantifying effects of UV-B, temperature,  
314 and pH on eDNA degradation in aquatic microcosms. *Biol. Conserv.* 183, 85-92.  
315 doi:10.1016/j.biocon.2014.11.038
- 316 Taberlet, P., Coissac, E., Pompanon, F., Brochmann, C., Willerslev, E. (2012). Towards next -  
317 generation biodiversity assessment using DNA metabarcoding. *Mol. Ecol.* 21(8), 2045-2050.  
318 doi:10.1111/j.1365-294X.2012.05470.x
- 319 Takahara, T., Minamoto, T., Yamanaka, H., Doi, H., Kawabata, Z.I. (2012). Estimation of fish  
320 biomass using environmental DNA. *PloS One.* 7(4). doi:10.1371/journal.pone.0035868
- 321 Takahara, T., Taguchi, J., Yamagishi, S., Doi, H., Ogata, S., Yamanaka, H., Minamoto, T. (2020).  
322 Suppression of environmental DNA degradation in water samples associated with different storage  
323 temperature and period using benzalkonium chloride. *Limnol. Oceanogr.* 18(8), 437-445.  
324 doi:10.1002/lom3.10374
- 325 Thomsen, P.F., Kielgast, J., Iversen, L.L., Møller, P.R., Rasmussen, M., Willerslev, E. (2012).  
326 Detection of a diverse marine fish fauna using environmental DNA from seawater samples. *PLoS*  
327 *One.* 7(8):e41732. doi:10.1371/journal.pone.0041732
- 328 Tsuji, S., Takahara, T., Doi, H., Shibata, N., Yamanaka, H. (2019). The detection of aquatic  
329 macroorganisms using environmental DNA analysis—A review of methods for collection, extraction,  
330 and detection. *Environ. DNA.* 1(2), 99-108. doi:10.1002/edn3.21
- 331 Tsuji, S., Yamanaka, H., Minamoto, T. (2017). Effects of water pH and proteinase K treatment on the  
332 yield of environmental DNA from water samples. *Limnol.* 18(1), 1-7. doi:10.1007/s10201-016-0483-  
333 x
- 334 Turner, C.R., Miller, D.J., Coyne, K.J., Corush, J. (2014). Improved methods for capture, extraction,  
335 and quantitative assay of environmental DNA from Asian bigheaded carp (*Hypophthalmichthys*  
336 spp.). *PloS One.* 9(12):e114329. doi:10.1371/journal.pone.0114329
- 337 Turner, C.R., Uy, K.L., Everhart, R.C. (2015). Fish environmental DNA is more concentrated in  
338 aquatic sediments than surface water. *Biol. Conserv.* 183, 93-102. doi:10.1016/j.biocon.2014.11.017
- 339 Ushio, M., Murakami, H., Masuda, R., Sado, T., Miya, M., Sakurai, S., Yamanaka, H., Minamoto,  
340 T., Kondoh, M. (2018). Quantitative monitoring of multispecies fish environmental DNA using high-  
341 throughput sequencing. *Metabarcoding Metagenom.* 2:e23297. doi:10.3897/mbmg.2.23297
- 342 Villacorta-Rath, C., Adekunle, A.I., Edmunds, R.C., Strugnell, J.M., Schwarzkopf, L., Burrows, D.  
343 (2020). Can environmental DNA be used to detect first arrivals of the cane toad, *Rhinella marina*,  
344 into novel locations? *Environ. DNA.* doi:10.1002/edn3.114
- 345 Wei, N., Nakajima, F., Tobino, T. (2018). A microcosm study of surface sediment environmental  
346 DNA: decay observation, abundance estimation, and fragment length comparison. *Environ. Sci.*  
347 *Technol.* 52(21), 12428-12435. doi:10.1021/acs.est.8b04956

- 348 Weltz, K., Lyle, J.M., Ovenden, J., Morgan, J.A., Moreno, D.A., Semmens, J.M. (2017). Application  
349 of environmental DNA to detect an endangered marine skate species in the wild. *PLoS One*.  
350 12(6):e0178124. doi:10.1371/journal.pone.0178124
- 351 Wood, S.A., Biessy, L., Latchford, J.L., Zaiko, A., von Ammon, U., Audrezet, F., Cristescu, M.E.,  
352 Pochon, X. (2020). Release and degradation of environmental DNA and RNA in a marine system.  
353 *Sci. Total Environ.* 704:135314. doi:10.1016/j.scitotenv.2019.135314
- 354 Yamanaka, H., Minamoto, T., Matsuura, J., Sakurai, S., Tsuji, S., Motozawa, H., Hongo, M., Sogo,  
355 Y., Kakimi, N., Teramura, I., Sugita, M. (2017). A simple method for preserving environmental  
356 DNA in water samples at ambient temperature by addition of cationic surfactant. *Limnol.* 18(2), 233-  
357 241. doi:10.1007/s10201-016-0508-5
- 358 Zulkefli, N.S., Kim, K.H., Hwang, S.J. (2019). Effects of microbial activity and environmental  
359 parameters on the degradation of extracellular environmental DNA from a eutrophic lake. *Int. J.*  
360 *Environ. Res. Public Health.* 16(18):3339. doi:10.3390/ijerph16183339

361

## 362 **Figure Captions**

363 Figure 1. The eDNA degradation rate (simple exponential slope) with **(A)** DNA region and **(B)** water  
364 source. The dots indicate the individual eDNA degradation rate in each experiment in different  
365 ecosystems: seawater, blue; freshwater, red. The boxes and bars in the box plot indicate median  $\pm$   
366 inter-quartiles and  $\pm 1.5 \times$  inter-quartiles, respectively.

367

368 Figure 2. The relationship between standardized eDNA degradation rate per hour (simple exponential  
369 slope) with **(A)** water temperature and **(B)** DNA fragment length. The red lines show 0.95-quantile  
370 mixed-effect quantile models for each factor.

371

372 Figure 3. The simulation result for predicting eDNA degradation rate on the matrix of water  
373 temperature and fragment length.

374

375

376

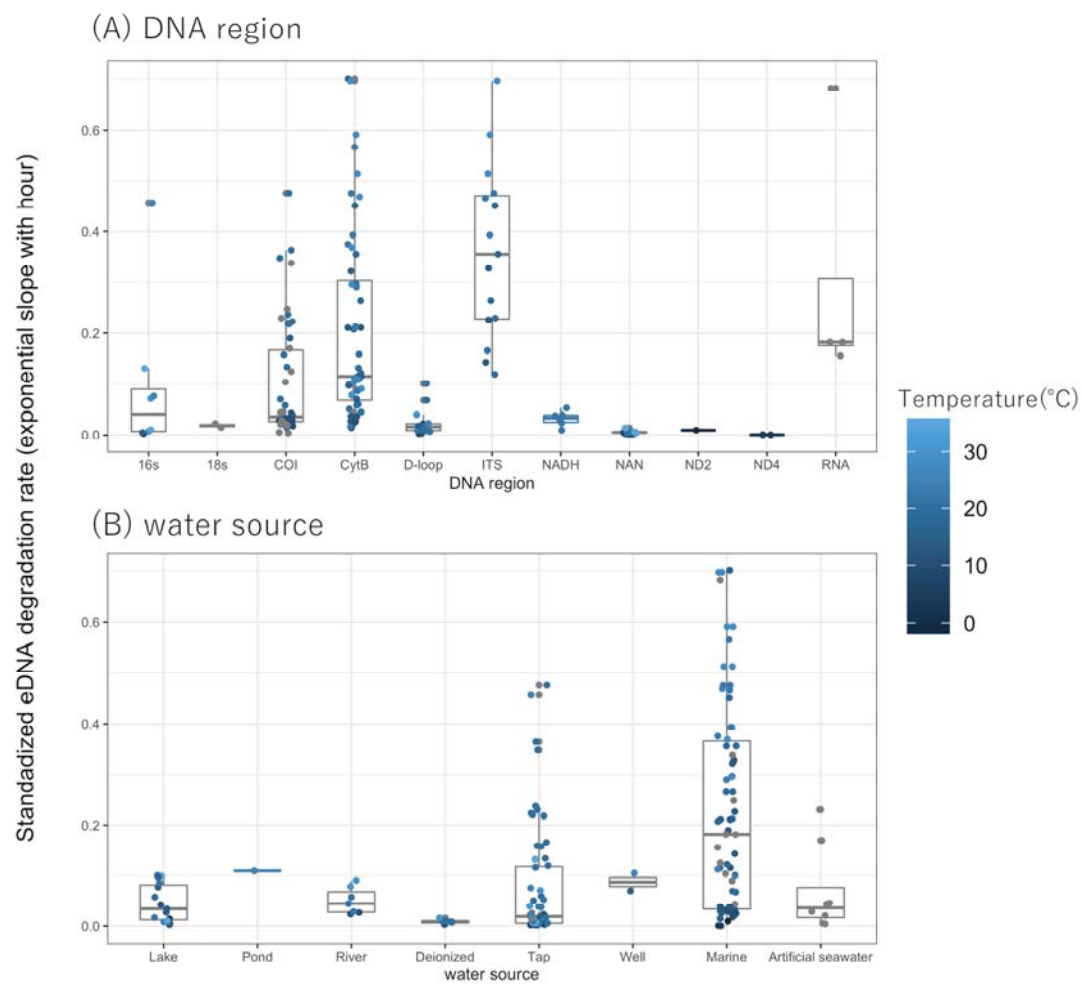

377  
378 Figure 1  
379  
380  
381

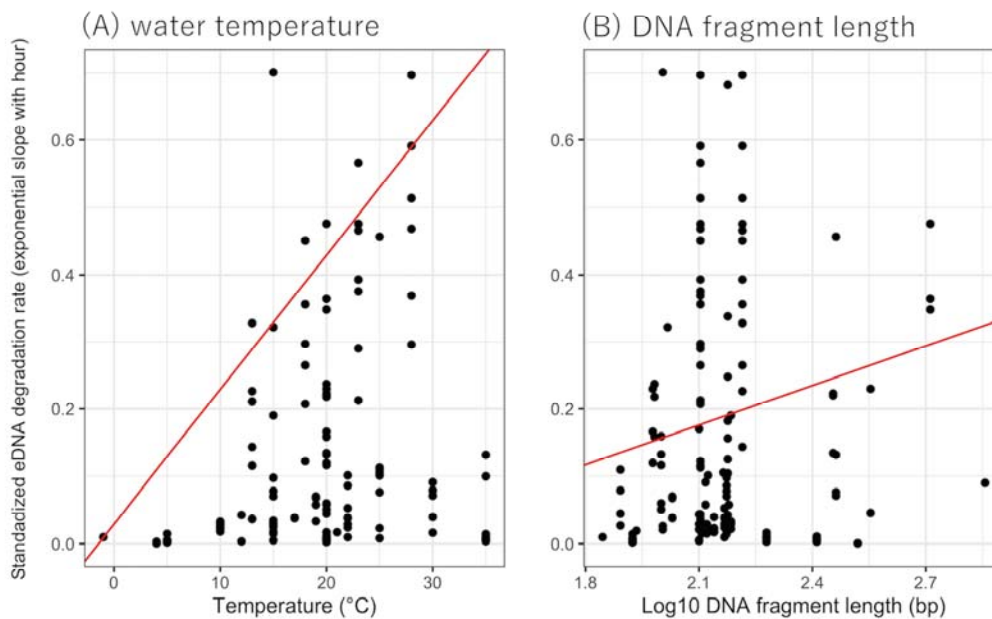

382  
383 Figure 2  
384  
385  
386

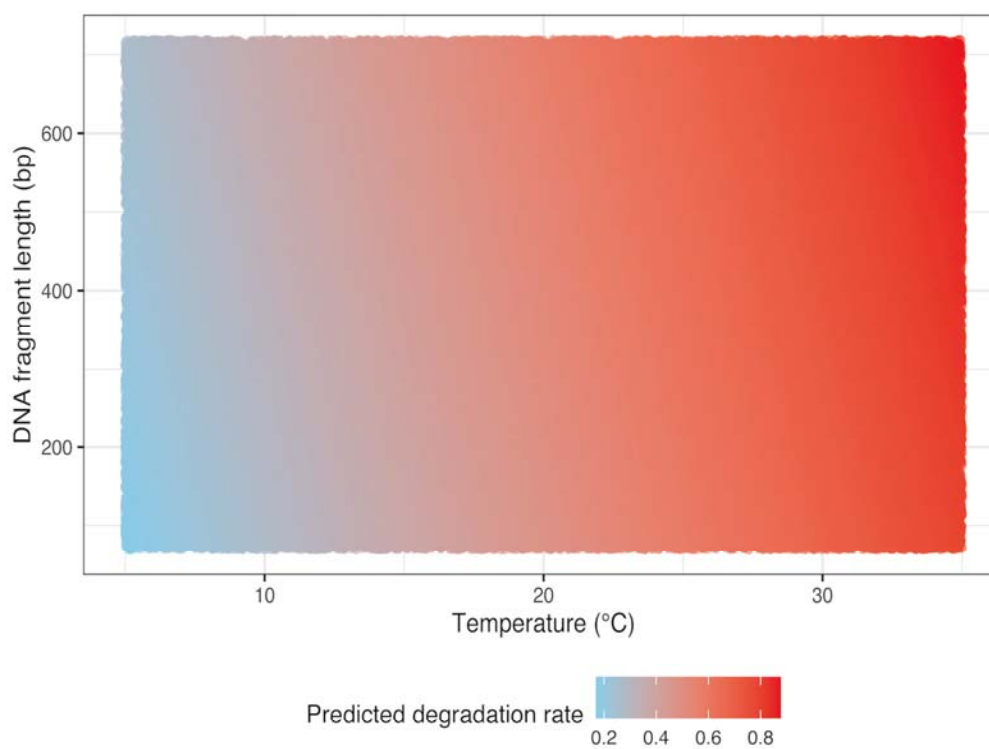

387  
388 Figure 3  
389  
390  
391

392 **Tables**

393 Table 1. The organisms, ecosystem types (Ecosystem), water source (Source), and PCR-amplified  
 394 DNA regions by quantitative PCR (Region) for all papers analyzed in this meta-analysis.

| Organism                           | Ecosystem  | Source              | Region | Reference             |
|------------------------------------|------------|---------------------|--------|-----------------------|
| <i>Gasterosteus aculeatus</i>      | Marine     | Marine              | CytB   | Thomsen et al.        |
| <i>Platichthys flesus</i>          | Marine     | Marine              | CytB   | Thomsen et al.        |
| <i>Lepomis macrochirus</i>         | Freshwater | Tap                 | CytB   | Maruyama et al        |
| <i>Cyprinus carpio</i>             | Freshwater | Well                | CytB   | Barnes et al.         |
| <i>Lithobates catesbeianus</i>     | Freshwater | Tap                 |        | Strickler et al.      |
| <i>Cyprinus carpio</i>             | Freshwater | Well                | CytB   | Eichmiller et al.     |
| <i>Cyprinus carpio</i>             | Freshwater | Lake                | CytB   | Eichmiller et al.     |
| <i>Engraulis mordax</i>            | Marine     | Marine              | D-loop | Sassoubre et al.      |
| <i>Sardinops sagax</i>             | Marine     | Marine              | D-loop | Sassoubre et al.      |
| <i>Scomber japonicus</i>           | Marine     | Marine              | COI    | Sassoubre et al.      |
| <i>Pacific chub mackerel</i>       | Marine     | Marine              | COI    | Andruszkiewicz et al. |
| <i>Zearaja maugeana</i>            | Marine     | Marine              | ND4    | Weltz et al.          |
| <i>Chrysaora pacifica</i>          | Marine     | Marine              | COI    | Minamoto et al.       |
| <i>Trachurus japonicus</i>         | Marine     | Marine              | CytB   | Jo et al.             |
| <i>Plecoglossus altivelis</i>      | Freshwater | River               | CytB   | Tsuji et al.          |
| <i>Cyprinus carpio</i>             | Freshwater | River               | CytB   | Tsuji et al.          |
| <i>Margaritifera margaritifera</i> | Freshwater | River               | NADH   | Sansom & Sassoubre    |
| <i>Carcinus maenas</i>             | Marine     | Marine              | COI    | Collins et al.        |
| <i>Lipophrys pholis</i>            | Marine     | Marine              | COI    | Collins et al.        |
| <i>Hypophthalmichthys nobilis</i>  | Freshwater | Deionized           | D-loop | Lance et al.          |
| <i>Chionodraco rastrispinosus</i>  | Marine     | Marine              | ND2    | Cowart et al.         |
| <i>Carassius auratus</i>           | Freshwater | Tap                 | ITS    | Bylemans et al.       |
| <i>Neogobius melanostomus</i>      | Freshwater | Lake                | COI    | Nevers et al.         |
| <i>Cyprinus carpio</i>             | Freshwater | River               | CytB   | Nukazawa et al.       |
| <i>Grandidierella japonica</i>     | Marine     | Artificial seawater | COI    | Wei et al.            |
| <i>Trachurus japonicus</i>         | Marine     | Marine              | CytB   | Jo et al.             |
| <i>Daphnia magna</i>               | Freshwater | Tap                 | COI    | Moushomi et al.       |
| <i>Daphnia magna</i>               | Freshwater | Tap                 | 18S    | Moushomi et al.       |
| cyanobacterial                     | Freshwater | Lake                | 16S    | Zulkefli et al.       |

|                                 |            |        |        |                        |
|---------------------------------|------------|--------|--------|------------------------|
| <i>Schistosoma mansoni</i>      | Freshwater | Tap    | COI    | Sengupta et al.        |
| <i>Trachurus japonicus</i>      | Marine     | Marine | CytB   | Jo et al.              |
| <i>Trachurus japonicus</i>      | Marine     | Marine | ITS    | Jo et al.              |
| <i>Styela clava</i>             | Marine     | Marine | COI    | Wood et al.            |
| <i>Spirographis spallanzani</i> | Marine     | Marine | COI    | Wood et al.            |
| <i>Styela clava</i>             | Marine     | Marine | RNA    | Wood et al.            |
| <i>Spirographis spallanzani</i> | Marine     | Marine | RNA    | Wood et al.            |
| <i>Anguilla japonica</i>        | Freshwater | Tap    | D-loop | Kasai et al.           |
| <i>Rhinella marina</i>          | Freshwater | Tap    | 16S    | Villacorta-Rath et al. |
| <i>Trachurus japonicus</i>      | Marine     | Marine | CytB   | Saito et al.           |
| <i>Cyprinus carpio</i>          | Freshwater | Pond   | CytB   | Saito et al.           |

---

395

396

397

398

399

400 **Supplementary Material**

401

| Organism                       | Ecosystem  | Source | Region | Fragment length | Time |
|--------------------------------|------------|--------|--------|-----------------|------|
| <i>Gasterosteus aculeatus</i>  | Marine     | Marine | CytB   | 101             |      |
| <i>Platichthys flesus</i>      | Marine     | Marine | CytB   | 104             |      |
| <i>Lepomis macrochirus</i>     | Freshwater | Tap    | CytB   | 100             |      |
| <i>Lepomis macrochirus</i>     | Freshwater | Tap    | CytB   | 100             |      |
| <i>Lepomis macrochirus</i>     | Freshwater | Tap    | CytB   | 100             |      |
| <i>Lepomis macrochirus</i>     | Freshwater | Tap    | CytB   | 100             |      |
| <i>Lepomis macrochirus</i>     | Freshwater | Tap    | CytB   | 100             |      |
| <i>Cyprinus carpio</i>         | Freshwater | Well   | CytB   | 146             |      |
| <i>Lithobates catesbeianus</i> | Freshwater | Tap    | NAN    | 84              |      |
| <i>Lithobates catesbeianus</i> | Freshwater | Tap    | NAN    | 84              |      |
| <i>Lithobates catesbeianus</i> | Freshwater | Tap    | NAN    | 84              |      |
| <i>Lithobates catesbeianus</i> | Freshwater | Tap    | NAN    | 84              |      |
| <i>Lithobates catesbeianus</i> | Freshwater | Tap    | NAN    | 84              |      |
| <i>Lithobates catesbeianus</i> | Freshwater | Tap    | NAN    | 84              |      |
| <i>Lithobates catesbeianus</i> | Freshwater | Tap    | NAN    | 84              |      |
| <i>Lithobates catesbeianus</i> | Freshwater | Tap    | NAN    | 84              |      |
| <i>Lithobates catesbeianus</i> | Freshwater | Tap    | NAN    | 84              |      |
| <i>Lithobates catesbeianus</i> | Freshwater | Tap    | NAN    | 84              |      |
| <i>Lithobates catesbeianus</i> | Freshwater | Tap    | NAN    | 84              |      |
| <i>Lithobates catesbeianus</i> | Freshwater | Tap    | NAN    | 84              |      |
| <i>Lithobates catesbeianus</i> | Freshwater | Tap    | NAN    | 84              |      |
| <i>Lithobates catesbeianus</i> | Freshwater | Tap    | NAN    | 84              |      |
| <i>Lithobates catesbeianus</i> | Freshwater | Tap    | NAN    | 84              |      |
| <i>Lithobates catesbeianus</i> | Freshwater | Tap    | NAN    | 84              |      |
| <i>Lithobates catesbeianus</i> | Freshwater | Tap    | NAN    | 84              |      |
| <i>Lithobates catesbeianus</i> | Freshwater | Tap    | NAN    | 84              |      |
| <i>Lithobates catesbeianus</i> | Freshwater | Tap    | NAN    | 84              |      |
| <i>Lithobates catesbeianus</i> | Freshwater | Tap    | NAN    | 84              |      |

|                                    |            |        |        |     |
|------------------------------------|------------|--------|--------|-----|
| <i>Lithobates catesbeianus</i>     | Freshwater | Tap    | NAN    | 84  |
| <i>Lithobates catesbeianus</i>     | Freshwater | Tap    | NAN    | 84  |
| <i>Lithobates catesbeianus</i>     | Freshwater | Tap    | NAN    | 84  |
| <i>Lithobates catesbeianus</i>     | Freshwater | Tap    | NAN    | 84  |
| <i>Lithobates catesbeianus</i>     | Freshwater | Tap    | NAN    | 84  |
| <i>Lithobates catesbeianus</i>     | Freshwater | Tap    | NAN    | 84  |
| <i>Lithobates catesbeianus</i>     | Freshwater | Tap    | NAN    | 84  |
| <i>Cyprinus carpio</i>             | Freshwater | Lake   | CytB   | 149 |
| <i>Cyprinus carpio</i>             | Freshwater | Lake   | CytB   | 149 |
| <i>Cyprinus carpio</i>             | Freshwater | Lake   | CytB   | 149 |
| <i>Cyprinus carpio</i>             | Freshwater | Lake   | CytB   | 149 |
| <i>Cyprinus carpio</i>             | Freshwater | Lake   | CytB   | 149 |
| <i>Cyprinus carpio</i>             | Freshwater | Lake   | CytB   | 149 |
| <i>Cyprinus carpio</i>             | Freshwater | Well   | CytB   | 149 |
| <i>Cyprinus carpio</i>             | Freshwater | Lake   | CytB   | 149 |
| <i>Engraulis mordax</i>            | Marine     | Marine | D-loop | 133 |
| <i>Sardinops sagax</i>             | Marine     | Marine | D-loop | 107 |
| <i>Scomber japonicus</i>           | Marine     | Marine | COI    | 107 |
| <i>Pacific chub mackerel</i>       | Marine     | Marine | COI    | 107 |
| <i>Pacific chub mackerel</i>       | Marine     | Marine | COI    | 107 |
| <i>Zearaja maugeana</i>            | Marine     | Marine | ND4    | 331 |
| <i>Zearaja maugeana</i>            | Marine     | Marine | ND4    | 331 |
| <i>Chrysaora pacifica</i>          | Marine     | Marine | COI    | 151 |
| <i>Trachurus japonicus</i>         | Marine     | Marine | CytB   | 719 |
| <i>Chrysaora pacifica</i>          | Marine     | Marine | CytB   | 127 |
| <i>Plecoglossus altivelis</i>      | Freshwater | River  | CytB   | 131 |
| <i>Plecoglossus altivelis</i>      | Freshwater | River  | CytB   | 131 |
| <i>Plecoglossus altivelis</i>      | Freshwater | River  | CytB   | 131 |
| <i>Cyprinus carpio</i>             | Freshwater | River  | CytB   | 78  |
| <i>Cyprinus carpio</i>             | Freshwater | River  | CytB   | 78  |
| <i>Cyprinus carpio</i>             | Freshwater | River  | CytB   | 78  |
| <i>Margaritifera margaritifera</i> | Freshwater | Tap    | NADH   | 147 |



|                                    |            |           |        |     |
|------------------------------------|------------|-----------|--------|-----|
| <i>Margaritifera margaritifera</i> | Freshwater | Tap       | NADH   | 147 |
| <i>Margaritifera margaritifera</i> | Freshwater | Tap       | NADH   | 147 |
| <i>Margaritifera margaritifera</i> | Freshwater | Tap       | NADH   | 147 |
| <i>Margaritifera margaritifera</i> | Freshwater | Tap       | NADH   | 147 |
| <i>Margaritifera margaritifera</i> | Freshwater | River     | NADH   | 147 |
| <i>Carcinus maenas</i>             | Marine     | Marine    | COI    | 153 |
| <i>Carcinus maenas</i>             | Marine     | Marine    | COI    | 153 |
| <i>Carcinus maenas</i>             | Marine     | Marine    | COI    | 153 |
| <i>Carcinus maenas</i>             | Marine     | Marine    | COI    | 153 |
| <i>Carcinus maenas</i>             | Marine     | Marine    | COI    | 153 |
| <i>Carcinus maenas</i>             | Marine     | Marine    | COI    | 153 |
| <i>Carcinus maenas</i>             | Marine     | Marine    | COI    | 153 |
| <i>Carcinus maenas</i>             | Marine     | Marine    | COI    | 153 |
| <i>Carcinus maenas</i>             | Marine     | Marine    | COI    | 153 |
| <i>Lipophrys pholis</i>            | Marine     | Marine    | COI    | 132 |
| <i>Lipophrys pholis</i>            | Marine     | Marine    | COI    | 132 |
| <i>Lipophrys pholis</i>            | Marine     | Marine    | COI    | 132 |
| <i>Lipophrys pholis</i>            | Marine     | Marine    | COI    | 132 |
| <i>Lipophrys pholis</i>            | Marine     | Marine    | COI    | 132 |
| <i>Lipophrys pholis</i>            | Marine     | Marine    | COI    | 132 |
| <i>Lipophrys pholis</i>            | Marine     | Marine    | COI    | 132 |
| <i>Lipophrys pholis</i>            | Marine     | Marine    | COI    | 132 |
| <i>Hypophthalmichthys nobilis</i>  | Freshwater | Deionized | D-loop | 190 |
| <i>Hypophthalmichthys nobilis</i>  | Freshwater | Deionized | D-loop | 190 |
| <i>Hypophthalmichthys nobilis</i>  | Freshwater | Deionized | D-loop | 190 |
| <i>Hypophthalmichthys nobilis</i>  | Freshwater | Deionized | D-loop | 190 |
| <i>Hypophthalmichthys nobilis</i>  | Freshwater | Deionized | D-loop | 190 |
| <i>Hypophthalmichthys nobilis</i>  | Freshwater | Deionized | D-loop | 190 |
| <i>Hypophthalmichthys nobilis</i>  | Freshwater | Deionized | D-loop | 190 |
| <i>Hypophthalmichthys nobilis</i>  | Freshwater | Deionized | D-loop | 190 |
| <i>Hypophthalmichthys nobilis</i>  | Freshwater | Deionized | D-loop | 190 |
| <i>Chionodraco rastrospinosus</i>  | Marine     | Marine    | ND2    | 70  |
| <i>Carassius auratus</i>           | Freshwater | Tap       | COI    | 96  |
| <i>Carassius auratus</i>           | Freshwater | Tap       | COI    | 96  |

|                                |            |                     |      |     |
|--------------------------------|------------|---------------------|------|-----|
| <i>Carassius auratus</i>       | Freshwater | Tap                 | COI  | 96  |
| <i>Carassius auratus</i>       | Freshwater | Tap                 | COI  | 285 |
| <i>Carassius auratus</i>       | Freshwater | Tap                 | COI  | 285 |
| <i>Carassius auratus</i>       | Freshwater | Tap                 | COI  | 285 |
| <i>Carassius auratus</i>       | Freshwater | Tap                 | COI  | 515 |
| <i>Carassius auratus</i>       | Freshwater | Tap                 | COI  | 515 |
| <i>Carassius auratus</i>       | Freshwater | Tap                 | COI  | 515 |
| <i>Carassius auratus</i>       | Freshwater | Tap                 | ITS  | 95  |
| <i>Carassius auratus</i>       | Freshwater | Tap                 | ITS  | 95  |
| <i>Carassius auratus</i>       | Freshwater | Tap                 | ITS  | 95  |
| <i>Neogobius melanostomus</i>  | Freshwater | Lake                | COI  | 150 |
| <i>Neogobius melanostomus</i>  | Freshwater | Lake                | COI  | 151 |
| <i>Cyprinus carpio</i>         | Freshwater | Lake                | CytB | 149 |
| <i>Cyprinus carpio</i>         | Freshwater | Lake                | CytB | 149 |
| <i>Grandidierella japonica</i> | Marine     | Artificial seawater | COI  | 358 |
| <i>Grandidierella japonica</i> | Marine     | Artificial seawater | COI  | 358 |
| <i>Grandidierella japonica</i> | Marine     | Artificial seawater | COI  | 126 |
| <i>Grandidierella japonica</i> | Marine     | Artificial seawater | COI  | 126 |
| <i>Grandidierella japonica</i> | Marine     | Artificial seawater | COI  | 126 |
| <i>Grandidierella japonica</i> | Marine     | Artificial seawater | COI  | 126 |
| <i>Grandidierella japonica</i> | Marine     | Artificial seawater | COI  | 126 |
| <i>Grandidierella japonica</i> | Marine     | Artificial seawater | COI  | 126 |
| <i>Trachurus japonicus</i>     | Marine     | Marine              | CytB | 127 |
| <i>Trachurus japonicus</i>     | Marine     | Marine              | CytB | 127 |
| <i>Trachurus japonicus</i>     | Marine     | Marine              | CytB | 127 |
| <i>Trachurus japonicus</i>     | Marine     | Marine              | CytB | 127 |
| <i>Trachurus japonicus</i>     | Marine     | Marine              | CytB | 127 |
| <i>Trachurus japonicus</i>     | Marine     | Marine              | CytB | 127 |
| <i>Trachurus japonicus</i>     | Marine     | Marine              | CytB | 127 |
| <i>Trachurus japonicus</i>     | Marine     | Marine              | CytB | 127 |
| <i>Trachurus japonicus</i>     | Marine     | Marine              | CytB | 127 |
| <i>Trachurus japonicus</i>     | Marine     | Marine              | CytB | 127 |
| <i>Trachurus japonicus</i>     | Marine     | Marine              | CytB | 127 |

|                            |            |        |      |     |
|----------------------------|------------|--------|------|-----|
| <i>Trachurus japonicus</i> | Marine     | Marine | CytB | 127 |
| <i>Trachurus japonicus</i> | Marine     | Marine | CytB | 127 |
| <i>Daphnia magna</i>       | Freshwater | Tap    | COI  | 101 |
| <i>Daphnia magna</i>       | Freshwater | Tap    | COI  | 101 |
| <i>Daphnia magna</i>       | Freshwater | Tap    | 18s  | 128 |
| <i>Daphnia magna</i>       | Freshwater | Tap    | 18s  | 128 |
| cyanobacterial             | Freshwater | Lake   | 16s  | 258 |
| cyanobacterial             | Freshwater | Lake   | 16s  | 258 |
| cyanobacterial             | Freshwater | Lake   | 16s  | 258 |
| cyanobacterial             | Freshwater | Lake   | 16s  | 258 |
| <i>Schistosoma mansoni</i> | Freshwater | Tap    | COI  | 86  |
| <i>Trachurus japonicus</i> | Marine     | Marine | CytB | 127 |
| <i>Trachurus japonicus</i> | Marine     | Marine | CytB | 127 |
| <i>Trachurus japonicus</i> | Marine     | Marine | CytB | 127 |
| <i>Trachurus japonicus</i> | Marine     | Marine | CytB | 127 |
| <i>Trachurus japonicus</i> | Marine     | Marine | CytB | 127 |
| <i>Trachurus japonicus</i> | Marine     | Marine | CytB | 127 |
| <i>Trachurus japonicus</i> | Marine     | Marine | CytB | 127 |
| <i>Trachurus japonicus</i> | Marine     | Marine | CytB | 127 |
| <i>Trachurus japonicus</i> | Marine     | Marine | CytB | 127 |
| <i>Trachurus japonicus</i> | Marine     | Marine | CytB | 127 |
| <i>Trachurus japonicus</i> | Marine     | Marine | CytB | 127 |
| <i>Trachurus japonicus</i> | Marine     | Marine | CytB | 127 |
| <i>Trachurus japonicus</i> | Marine     | Marine | CytB | 127 |
| <i>Trachurus japonicus</i> | Marine     | Marine | CytB | 127 |
| <i>Trachurus japonicus</i> | Marine     | Marine | CytB | 127 |
| <i>Trachurus japonicus</i> | Marine     | Marine | ITS  | 164 |
| <i>Trachurus japonicus</i> | Marine     | Marine | ITS  | 164 |
| <i>Trachurus japonicus</i> | Marine     | Marine | ITS  | 164 |
| <i>Trachurus japonicus</i> | Marine     | Marine | ITS  | 164 |
| <i>Trachurus japonicus</i> | Marine     | Marine | ITS  | 164 |
| <i>Trachurus japonicus</i> | Marine     | Marine | ITS  | 164 |
| <i>Trachurus japonicus</i> | Marine     | Marine | ITS  | 164 |
| <i>Trachurus japonicus</i> | Marine     | Marine | ITS  | 164 |
| <i>Trachurus japonicus</i> | Marine     | Marine | ITS  | 164 |
| <i>Trachurus japonicus</i> | Marine     | Marine | ITS  | 164 |

|                                 |            |        |        |     |
|---------------------------------|------------|--------|--------|-----|
| <i>Trachurus japonicus</i>      | Marine     | Marine | ITS    | 164 |
| <i>Trachurus japonicus</i>      | Marine     | Marine | ITS    | 164 |
| <i>Trachurus japonicus</i>      | Marine     | Marine | ITS    | 164 |
| <i>Styela clava</i>             | Marine     | Marine | COI    | 150 |
| <i>Styela clava</i>             | Marine     | Marine | COI    | 150 |
| <i>Spirographis spallanzani</i> | Marine     | Marine | COI    | 150 |
| <i>Spirographis spallanzani</i> | Marine     | Marine | COI    | 150 |
| <i>Styela clava</i>             | Marine     | Marine | RNA    | 150 |
| <i>Styela clava</i>             | Marine     | Marine | RNA    | 150 |
| <i>Spirographis spallanzani</i> | Marine     | Marine | RNA    | 150 |
| <i>Spirographis spallanzani</i> | Marine     | Marine | RNA    | 150 |
| <i>Anguilla japonica</i>        | Freshwater | Tap    | D-loop | 138 |
| <i>Anguilla japonica</i>        | Freshwater | Tap    | D-loop | 138 |
| <i>Anguilla japonica</i>        | Freshwater | Tap    | D-loop | 138 |
| <i>Anguilla japonica</i>        | Freshwater | Tap    | D-loop | 138 |
| <i>Anguilla japonica</i>        | Freshwater | Tap    | D-loop | 138 |
| <i>Rhinella marina</i>          | Freshwater | Tap    | 16s    | 290 |
| <i>Rhinella marina</i>          | Freshwater | Tap    | 16s    | 290 |
| <i>Rhinella marina</i>          | Freshwater | Tap    | 16s    | 290 |
| <i>Rhinella marina</i>          | Freshwater | Tap    | 16s    | 290 |
| <i>Trachurus japonicus</i>      | Marine     | Marine | CytB   | 127 |
| <i>Cyprinus carpio</i>          | Freshwater | Pond   | CytB   | 78  |

402

403
